# Supplementary material
Source: PubMed Central journal article supplement (PMC3069763)
Supplement: JCI43242sd.pdf [file JCI43242sd.pdf]

# Supplemental Data

## **NKp46 Identifies an NKT Cell Subset Susceptible to Leukemic Transformation in Mouse and Man**

Jianhua Yu<sup>1,2\*</sup>, Takeki Mitsui<sup>1,3\*</sup>, Min Wei<sup>1</sup>, Hsiaoyin Mao<sup>1</sup>, Jonathan P Butchar<sup>4</sup>, Mithun Vinod Shah<sup>5</sup>, Jianying Zhang<sup>6</sup>, Anjali Mishra<sup>1</sup>, Christopher Alvarez-Breckenridge<sup>1</sup>, Xingluo Liu<sup>1</sup>, Shujun Liu<sup>1,2</sup>, Akihiko Yokohama<sup>1,3</sup>, Rossana Trotta<sup>1</sup>, Guido Marcucci<sup>1,2,7</sup>, Don M. Benson Jr.<sup>1,2,7</sup>, Thomas P. Loughran Jr.<sup>5</sup>, Susheela Tridandapani<sup>4</sup>, and Michael A. Caligiuri<sup>1,2,7</sup>

<sup>1</sup>Department of Molecular Virology, Immunology, and Medical Genetics, The Ohio State University, Columbus, OH 43210, USA;

<sup>2</sup>Division of Hematology/Oncology, Department of Internal Medicine, The Ohio State University, Columbus, OH 43210, USA;

<sup>3</sup>Department of Medicine and Clinical Science, Graduate School of Medicine, Gunma University, Maebashi, Japan;

<sup>4</sup>Division of Pulmonary, Allergy, Critical Care and Sleep Medicine, The Ohio State University, Columbus, OH 43210, USA;

<sup>5</sup>Penn State Hershey Cancer Institute, Hershey, PA 17033, USA;

<sup>6</sup>Center for Biostatistics, The Ohio State University, Columbus, OH 43210, USA;

<sup>7</sup>The Ohio State University Comprehensive Cancer Center, The James Cancer Hospital and Solove Research Institute, Columbus, OH 43210, USA.

\*These authors equally contributed to this work.

## Supplemental Fig. 1A

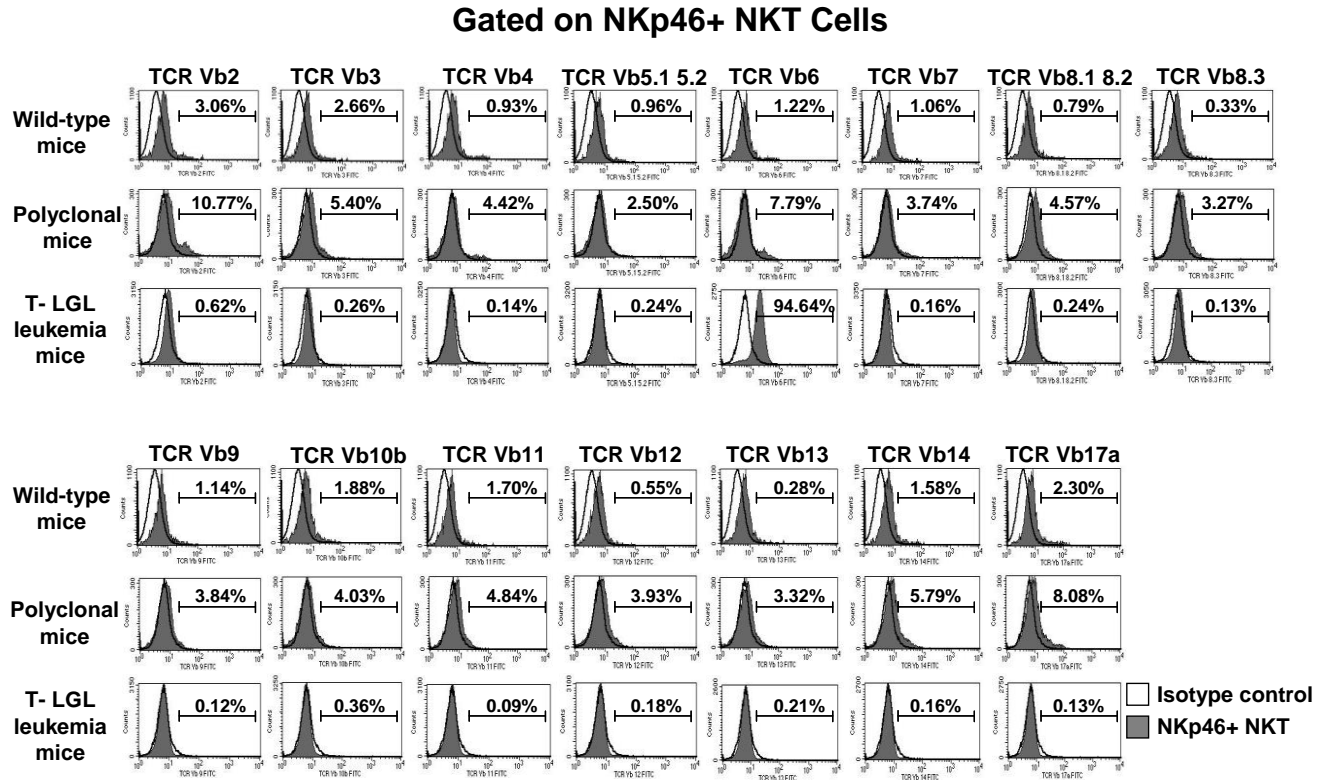

**Supplemental Figure 1A. Flow cytometric analysis of TCR Vβs expression on NKp46+ NKT cells in WT, polyclonal and IL-15tg T-LGL leukemia mice.** Skewing of TCR Vβ expression was observed within the gated NKp46+NK1.1+CD3+ population in IL-15tg polyclonal mice (note TCR Vβ2 and TCR Vβ6 compared to WT mice). Monoclonal expansion of the TCR Vβ6 population was detected in a particular IL-15tg T-LGL leukemia. Representative plots from one of three independent experiments are shown. Percentages of cells positive for each TCR Vβ are indicated.

## Supplemental Fig. 1B

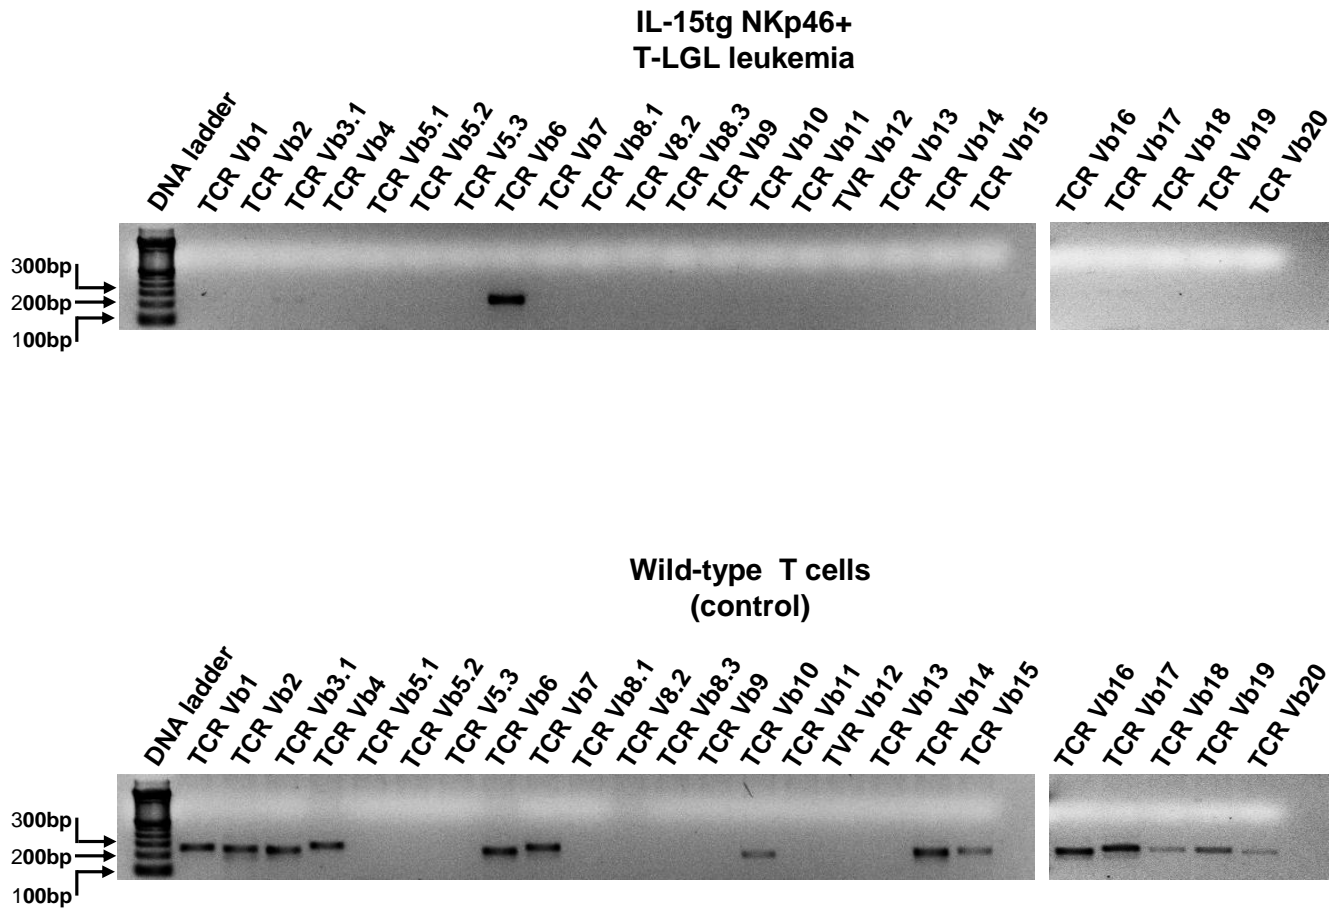

**Supplemental Figure 1B. PCR analysis of TCR V $\beta$ s expression on NKp46+ T-LGL leukemia cells.** TCR V $\beta$ 6 monoclonal expansion of NKp46+CD3+NK1.1+ NKT cells in the leukemic mouse shown in Supplemental Figure 1A was confirmed by PCR analysis of 24 TCR V $\beta$ s. FACS-purified T cells from wild-type (WT) mice served as a control.

## Supplemental Fig. 2A

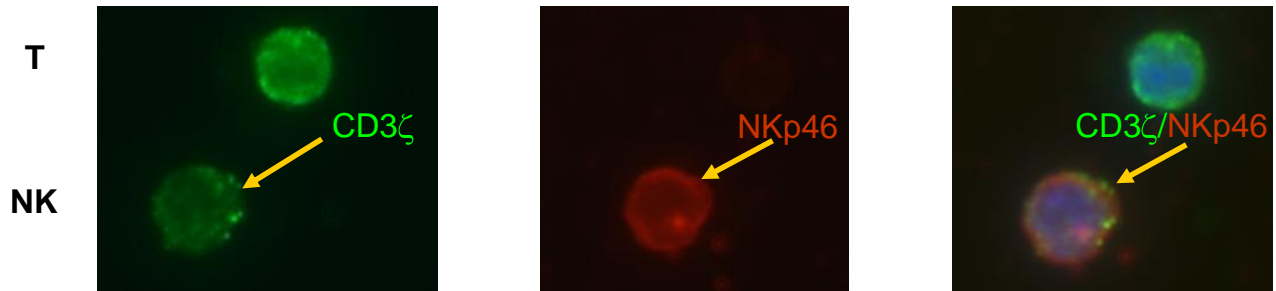

## Supplemental Fig. 2B

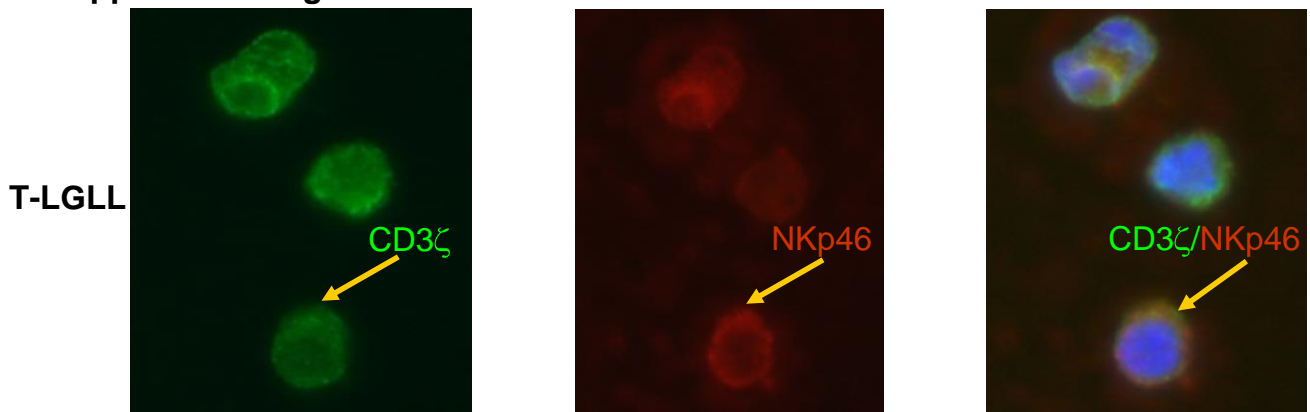

**Supplemental Figure 2. Expression of NKp46 and CD3 $\zeta$  co-exists in the same region in an NK cell and a T-LGL leukemia cell.** (A) Enriched NK cells by RosetteSep cocktail (Stem Cell Technologies) were stained with rabbit anti-human CD3 $\zeta$  and goat anti-human NKp46 (R & D) primary mAbs, followed by staining with donkey anti-rabbit AF488 and donkey anti-goat AF594 secondary mAbs (Invitrogen), respectively. DAPI (blue) was included to stain nuclei. Representative pictures from one of at least three independent experiments indicated that expression of some NKp46 (red) and CD3 $\zeta$  (green) co-existed in the same region in an NKp46+ human NK cell. The T cell in the same field did not stain for NKp46. Magnification, 630x. (B) CD3+CD56+ LGL leukemia (T-LGLL) cells were FACS-enriched and stained using the exact method that was described in (A).

Supplemental Fig. 3

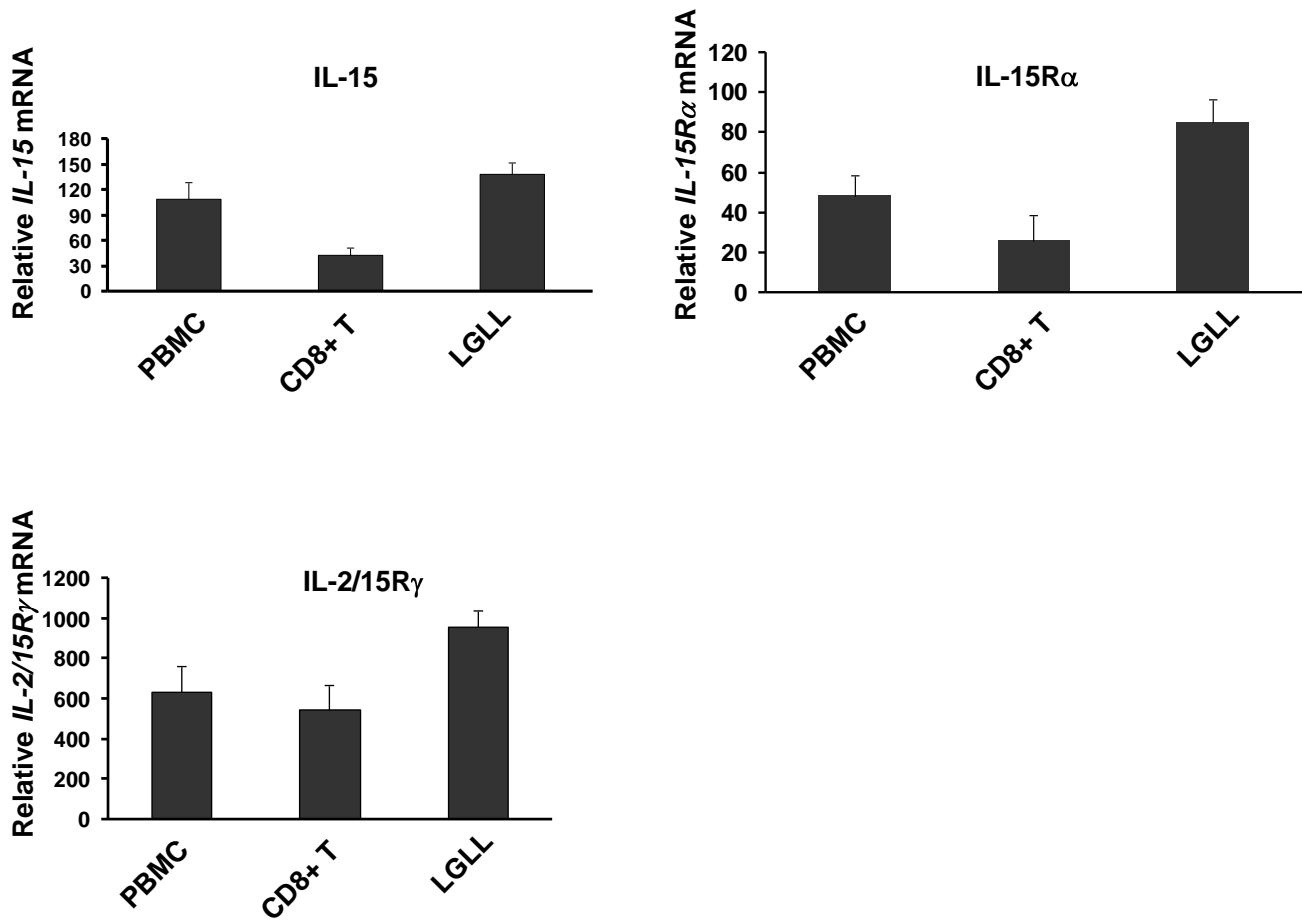

**Supplemental Figure 3. Expression of IL-15 and its receptors in T-LGL leukemia cells.**

Microarray analysis comparing IL-15, IL-15 receptor  $\alpha$  and IL-15 receptor  $\gamma$  expression in isolated PBMC ( $n = 4$ ) and CD8+ T cells ( $n = 4$ ) from healthy donors to those in T-LGL leukemia patient samples (majority of the 34 samples are CD8+). IL-15 expression was significantly upregulated when compared to the normal CD8+ T cell control ( $p < 0.01$ ), while predictably not upregulated when compared to the normal PBMC control (which includes antigen presenting cells that normally express IL-15) ( $p = 0.25$ ). Both IL-15 receptor  $\alpha$  and IL-15 receptor  $\gamma$  expression in T-LGL leukemia patient samples were upregulated when compared to both the CD8+ T cell control and the PBMC control ( $p < 0.05$  for each comparison).

| <b>Supplemental Table 1. Percent CD3+NKp46+ cells among lymphocyte populations</b> |                           |
|------------------------------------------------------------------------------------|---------------------------|
| <b>Organ</b>                                                                       | <b>Percent CD3+NKp46+</b> |
| <b>Spleen</b>                                                                      | <b>0.20 ± 0.01</b>        |
| <b>Bone marrow</b>                                                                 | <b>0.35 ± 0.02*</b>       |
| <b>Peripheral blood</b>                                                            | <b>0.16 ± 0.01</b>        |
| <b>Thymus</b>                                                                      | <b>0.06 ± 0.005</b>       |

These results are averaged from three mice. \* The percentage of NKp46+CD3+ T cells in bone marrow is relatively higher than that in other organs ( $p < 0.001$ ,  $n = 3$ )

**Supplemental Table 2 : Differential gene expression between NKp46+ and NKp46- NKT cells****A. Up-Regulated Gene in NKp46+ Cells**

| Gene Name                                    | Gene Symbol | Fold Change | P value   |
|----------------------------------------------|-------------|-------------|-----------|
| natural cytotoxicity triggering receptor 1   | Ncr1        | 112.2621279 | 0.0000276 |
| acyloxyacyl hydrolase                        | Aoah        | 18.3563842  | 0.0000533 |
| TYRO protein tyrosine kinase binding protein | Tyrobp      | 18.0097344  | 0.0001219 |
| elastin microfibril interfacier 2            | Emilin2     | 12.1054894  | 0.0000241 |

**B. Down-Regulated Gene in NKp46+ Cells**

| Gene Name                                                 | Gene Symbol | Fold Change | P value   |
|-----------------------------------------------------------|-------------|-------------|-----------|
| CD4 antigen                                               | Cd4         | -69.8947893 | 0.0000234 |
| cytotoxic T-lymphocyte-associated protein 4               | Ctla4       | -50.3632682 | 0.0001690 |
| forkhead box P3                                           | Foxp3       | -48.5716301 | 0.0000045 |
| ankyrin repeat domain 6                                   | Ankrd6      | -48.0240610 | 0.0000070 |
| chemokine (C-C motif) receptor 6                          | Ccr6        | -27.4500905 | 0.0000172 |
| signaling lymphocytic activation molecule family member 1 | Slamf1      | -25.4527829 | 0.0001805 |
| neuritin 1                                                | Nrn1        | -24.2396506 | 0.0001355 |
| coiled-coil domain containing 22                          | Ccdc22      | -23.0392365 | 0.0000220 |
| interleukin 1 receptor-like 1                             | Il1rl1      | -22.8466067 | 0.0000645 |
| megakaryocyte-associated tyrosine kinase                  | Matk        | -22.1297385 | 0.0001529 |
| actin, gamma 2, smooth muscle, enteric                    | Actg2       | -20.9072803 | 0.0000117 |
| aryl hydrocarbon receptor nuclear translocator 2          | Arnt2       | -20.5493307 | 0.0001280 |
| chemokine (C-C motif) receptor 4                          | Ccr4        | -19.9408362 | 0.0000109 |
| cytochrome P450, family 2, subfamily s, polypeptide 1     | Cyp2s1      | -19.3379304 | 0.0000160 |
| integrin alpha E, epithelial-associated                   | Itgae       | -18.2175936 | 0.0001581 |
| killer cell lectin-like receptor subfamily G, member 1    | Klrg1       | -17.9706726 | 0.0000787 |

| Gene Name                                                    | Gene Symbol   | Fold Change | P Value   |
|--------------------------------------------------------------|---------------|-------------|-----------|
| argininosuccinate synthetase 1                               | Ass1          | -17.8762782 | 0.0000455 |
| guanylate binding protein 1                                  | Gbp1          | -17.7521087 | 0.0000928 |
| Rho guanine nucleotide exchange factor (GEF) 12              | Arhgef12      | -17.1404193 | 0.0000285 |
| src homology 2 domain-containing transforming protein E      | She           | -17.1392075 | 0.0001451 |
| a disintegrin and metallopeptidase domain 12 (meltrin alpha) | Adam12        | -17.1085371 | 0.0000695 |
| chondroitin sulfate N-acetylgalactosaminyltransferase 1      | Csgalnact1    | -15.7891763 | 0.0000330 |
| syndecan binding protein (syntenin) 2                        | Sdcbp2        | -15.2042737 | 0.0001198 |
| a disintegrin and metallopeptidase domain 12 (meltrin alpha) | Adam12        | -15.048497  | 0.0000240 |
| ankyrin repeat domain 6                                      | Ankrd6        | -13.6979728 | 0.0000294 |
| CD81 antigen                                                 | Cd81          | -12.9922465 | 0.0000378 |
| Epstein-Barr virus induced gene 3                            | Ebi3          | -12.8821947 | 0.0001261 |
| nucleobindin 2                                               | Nucb2         | -12.2627658 | 0.0001679 |
| RIKEN cDNA D430019H16 gene                                   | D430019H16Rik | -12.2613549 | 0.0002142 |
| RIKEN cDNA 1110059G02 gene                                   | 1110059G02Rik | -12.2430406 | 0.0000934 |
| leucine-rich repeats and immunoglobulin-like domains 1       | Lrig1         | -11.9554829 | 0.0001478 |
| syndecan 4                                                   | Sdc4          | -11.9270306 | 0.0000268 |
| neuropilin 1                                                 | Nrp1          | -11.8832743 | 0.0000869 |
| Rho guanine nucleotide exchange factor (GEF) 12              | Arhgef12      | -11.7251421 | 0.0000943 |
| zinc finger and BTB domain containing 32                     | Zbtb32        | -11.7195722 | 0.0001165 |
| purinergic receptor P2X, ligand-gated ion channel, 7         | P2rx7         | -11.6992083 | 0.0001180 |
| RIKEN cDNA 1110059G02 gene                                   | 1110059G02Rik | -11.6683689 | 0.0000383 |
| chemokine (C-C motif) receptor 3                             | Ccr3          | -11.2637515 | 0.0001989 |
| dystonin                                                     | Dst           | -11.2179333 | 0.0000817 |
| trans-acting transcription factor 6                          | Sp6           | -11.1784829 | 0.0002320 |



| <b>Gene Name</b>                                                           | <b>Gene Symbol</b> | <b>Fold Change</b> | <b>P Value</b> |
|----------------------------------------------------------------------------|--------------------|--------------------|----------------|
| microtubule associated monooxygenase, calponin and LIM domain containing 3 | Mical3             | -10.9677182        | 0.0000552      |
| serine (or cysteine) peptidase inhibitor, clade B, member 1a               | Serpinb1a          | -10.9240544        | 0.0000496      |
| RIKEN cDNA 1110059G02 gene                                                 | 1110059G02Rik      | -10.8877052        | 0.0000537      |
| legumain                                                                   | Lgmn               | -10.7073162        | 0.0001003      |
| colony stimulating factor 1 (macrophage)                                   | Csf1               | -10.5349678        | 0.0000618      |
| laminin, gamma 1                                                           | Lamc1              | -10.2816543        | 0.0001809      |
| IKAROS family zinc finger 4                                                | Ikzf4              | -10.2576511        | 0.0000826      |
| tumor necrosis factor receptor superfamily, member 4                       | Tnfrsf4            | -10.2419641        | 0.0000488      |
